# Supplementary material
Source: publisher figshare collection journal article supplement (https://acs.figshare.com/ndownloader/files/5200030)
Supplement: Supplementary file 1 [file 5200030]

data_CuL1 
_audit_creation_date                  'Fri Sep 12 04:22:17 2003'
_audit_creation_method                'by teXsan'
_audit_update_record                   ?
#------------------------------------------------------------------------------
# SUBMISSION DETAILS
_publ_contact_author_name             ' Hideki Masuda '
_publ_contact_author_address
;
       Department of Applied Chemistry
       Graduate School of Engineering
       Nagoya Institute of Technology
       Gokiso-cho, Showa-ku, Nagoya 466 - 8555
       Japan
;
_publ_contact_author_email            ' masuda@ach.nitech.ac.jp '
_publ_contact_author_fax                ' +81-52-735-5209 '
_publ_contact_author_phone            ' +81-52-735-5228 '
#------------------------------------------------------------------------------
#AUTHOR LIST
loop_
_publ_author_name
;
Syuhei Yamaguchi, Shigenori Nagatomo, Teizo Kitagawa, Yasuhiro Funahashi, Tomohiro Ozawa, Koichiro Jitsukawa, Hideki Masuda
;
#------------------------------------------------------------------------------
# NAME OF JOURNAL TO WHICH THE PAPER WILL BE SUBMITTED
_jounal_name_full               ' Inorganic Chemistry '
#------------------------------------------------------------------------------
data__CuL1
#------------------------------------------------------------------------------
# CHEMICAL DATA 
_chemical_formula_sum                  'C48 H64 Cl4 Cu2 N10 O18 '
_chemical_formula_moiety               '?'
_chemical_formula_weight               1337.99
_chemical_melting_point                ?
#------------------------------------------------------------------------------
# CRYSTAL DATA 
_symmetry_cell_setting                 orthorhombic
_symmetry_space_group_name_H-M        'P c a 21     '
_symmetry_Int_Tables_number            29
loop_
_symmetry_equiv_pos_as_xyz
x,y,z
-x,-y,1/2+z
1/2-x,y,1/2+z
1/2+x,-y,z
_cell_length_a                         20.1500(4)
_cell_length_b                         11.6300(5)
_cell_length_c                         23.9100(5)
_cell_angle_alpha                      90
_cell_angle_beta                       90
_cell_angle_gamma                      90
_cell_volume                           5603.2(3)
_cell_formula_units_Z                  4
_cell_measurement_reflns_used          14519
_cell_measurement_theta_min            3.0
_cell_measurement_theta_max            27.5
_cell_measurement_temperature          173.2
#------------------------------------------------------------------------------
_exptl_crystal_description            'Block'
_exptl_crystal_colour                 'Blue'
_exptl_crystal_size_max                0.500
_exptl_crystal_size_mid                0.500
_exptl_crystal_size_min                0.300
_exptl_crystal_size_rad                ?
_exptl_crystal_density_diffrn          1.586
_exptl_crystal_density_meas            ?
_exptl_crystal_density_method         'not measured'
_exptl_absorpt_coefficient_mu          1.031
_exptl_absorpt_correction_type         numerical
_exptl_absorpt_process_details        _exptl_absorpt_correction_T_min        0.609
_exptl_absorpt_correction_T_max        0.734
#------------------------------------------------------------------------------
# EXPERIMENTAL DATA 
_diffrn_radiation_type                'Mo K\a'
_diffrn_radiation_wavelength           0.7107
_diffrn_measurement_device_type       'Rigaku/MSC Mercury CCD'
_diffrn_measurement_method             \w
_diffrn_detector_area_resol_mean       7.32
_diffrn_reflns_number                  14519
_diffrn_reflns_av_R_equivalents        0.037
_diffrn_reflns_theta_max               27.49
_diffrn_measured_fraction_theta_max    0.9904
_diffrn_reflns_theta_full              27.49
_diffrn_measured_fraction_theta_full   0.9904
_diffrn_reflns_limit_h_min             -24
_diffrn_reflns_limit_h_max             26
_diffrn_reflns_limit_k_min             -15
_diffrn_reflns_limit_k_max             15
_diffrn_reflns_limit_l_min             -30
_diffrn_reflns_limit_l_max             31
#------------------------------------------------------------------------------
# REFINEMENT DATA 
_refine_special_details
;
Refinement using reflections with F^2^ > 2.0 sigma(F^2^). The weighted 
R-factor (wR) and goodness of fit (S) are based on F^2^. R-factor (gt) are 
based on F. The threshold expression of F^2^ > 2.0 sigma(F^2^) is used only 
for calculating R-factor (gt).
;
_reflns_number_total                   6510
_reflns_number_gt                      5288
_reflns_threshold_expression           F^2^>2.0\s(F^2^)
_refine_ls_structure_factor_coef       Fsqd
_refine_ls_R_factor_gt                 0.0557
_refine_ls_wR_factor_ref               0.1383
_refine_ls_hydrogen_treatment          noref
_refine_ls_number_reflns               5288
_refine_ls_number_parameters           769
_refine_ls_goodness_of_fit_ref         1.599
_refine_ls_weighting_scheme            calc
_refine_ls_weighting_details
   'w = 1/[\s^2^(Fo^2^) + (0.05000(Max(Fo^2^,0) + 2Fc^2^)/3)^2^]'
_refine_ls_shift/su_max                0.0337
_refine_diff_density_max               0.93
_refine_diff_density_min               -0.69
_refine_ls_extinction_method           none
_refine_ls_extinction_coef             ?
_refine_ls_abs_structure_details       ?
_refine_ls_abs_structure_Flack         ?
loop_
_atom_type_symbol
_atom_type_description
_atom_type_scat_dispersion_real
_atom_type_scat_dispersion_imag
_atom_type_scat_source
  'C' 'C'  0.003 0.002 
;International Tables for Crystallography
(1992, Vol. C, Tables 4.2.6.8 and 6.1.1.1)
;
  'H' 'H'  0.000 0.000 
;International Tables for Crystallography
(1992, Vol. C, Table 6.1.1.2)
;
  'Cl' 'Cl'  0.148 0.159 
;International Tables for Crystallography
(1992, Vol. C, Tables 4.2.6.8 and 6.1.1.1)
;
  'Cu' 'Cu'  0.320 1.265 
;International Tables for Crystallography
(1992, Vol. C, Tables 4.2.6.8 and 6.1.1.1)
;
  'N' 'N'  0.006 0.003 
;International Tables for Crystallography
(1992, Vol. C, Tables 4.2.6.8 and 6.1.1.1)
;
  'O' 'O'  0.011 0.006 
;International Tables for Crystallography
(1992, Vol. C, Tables 4.2.6.8 and 6.1.1.1)
;
#------------------------------------------------------------------------------
# ATOMIC COORDINATES AND DISPLACEMENT PARAMETERS 
loop_
_atom_site_label
_atom_site_type_symbol
_atom_site_fract_x
_atom_site_fract_y
_atom_site_fract_z
_atom_site_U_iso_or_equiv
_atom_site_adp_type
_atom_site_occupancy
_atom_site_calc_flag
_atom_site_refinement_flags
_atom_site_disorder_assembly
_atom_site_disorder_group
 Cu(1)  Cu 0.83648(3)  -0.48046(6) -0.6616(6)  0.0396(2)   Uani 1.00 d . . .
 Cu(2)  Cu 0.90822(3)  0.02279(6)  -0.3815(6)  0.0385(1)   Uani 1.00 d . . .
 Cl(1)  Cl 0.85854(9)  -0.9831(1)  -0.7960(6)  0.0598(4)   Uani 1.00 d . . .
 Cl(2)  Cl 0.69665(8)  -0.9881(1)  -0.6171(6)  0.0554(4)   Uani 1.00 d . . .
 Cl(3)  Cl 0.59792(8)  -0.4986(1)  -0.7464(6)  0.0520(4)   Uani 1.00 d . . .
 Cl(4)  Cl 0.45246(8)  -0.4858(1)  -0.9261(6)  0.0557(4)   Uani 1.00 d . . .
 O(1)   O  0.8652(2)   -0.6174(3)  -0.6230(6)  0.0480(9)   Uani 1.00 d . . .
 O(2)   O  0.8793(2)   -0.1143(3)  -0.4227(6)  0.0476(9)   Uani 1.00 d . . .
 O(3)   O  0.9024(3)   -0.9368(8)  -0.8373(7)  0.116(3)    Uani 1.00 d . . .
 O(4)   O  0.8942(5)   -1.0001(10) -0.7472(7)  0.149(4)    Uani 1.00 d . . .
 O(5)   O  0.8052(3)   -0.9112(6)  -0.7867(7)  0.119(3)    Uani 1.00 d . . .
 O(6)   O  0.8335(3)   -1.0890(5)  -0.8175(7)  0.107(2)    Uani 1.00 d . . .
 O(7)   O  0.7400(3)   -0.9907(5)  -0.6630(7)  0.082(2)    Uani 1.00 d . . .
 O(8)   O  0.7240(3)   -1.0565(8)  -0.5745(7)  0.120(3)    Uani 1.00 d . . .
 O(9)   O  0.6911(4)   -0.8767(6)  -0.5969(7)  0.111(2)    Uani 1.00 d . . .
 O(10)  O  0.6328(3)   -1.0328(7)  -0.6320(7)  0.094(2)    Uani 1.00 d . . .
 O(11)  O  0.6430(3)   -0.5514(6)  -0.7104(7)  0.084(2)    Uani 1.00 d . . .
 O(12)  O  0.6326(3)   -0.4696(7)  -0.7982(7)  0.095(2)    Uani 1.00 d . . .
 O(13)  O  0.5713(3)   -0.3975(4)  -0.7220(7)  0.091(2)    Uani 1.00 d . . .
 O(14)  O  0.5441(2)   -0.5750(5)  -0.7589(6)  0.075(2)    Uani 1.00 d . . .
 O(15)  O  0.4804(3)   -0.5589(8)  -0.9677(7)  0.107(2)    Uani 1.00 d . . .
 O(16)  O  0.4957(3)   -0.4882(5)  -0.8781(7)  0.076(2)    Uani 1.00 d . . .
 O(17)  O  0.4467(4)   -0.3735(7)  -0.9462(7)  0.133(3)    Uani 1.00 d . . .
 O(18)  O  0.3876(3)   -0.5260(7)  -0.9116(7)  0.091(2)    Uani 1.00 d . . .
 N(1)   N  0.8114(3)   -0.3287(4)  -0.6977(6)  0.050(1)    Uani 1.00 d . . .
 N(2)   N  0.9217(2)   -0.3872(4)  -0.6400(6)  0.048(1)    Uani 1.00 d . . .
 N(3)   N  0.7526(2)   -0.4505(4)  -0.6160(6)  0.045(1)    Uani 1.00 d . . .
 N(4)   N  0.8354(2)   -0.5496(4)  -0.7439(6)  0.045(1)    Uani 1.00 d . . .
 N(5)   N  0.8234(2)   -0.7697(4)  -0.6680(7)  0.051(1)    Uani 1.00 d . . .
 N(6)   N  0.9315(2)   0.1738(4)   -0.3465(6)  0.0444(10)  Uani 1.00 d . . .
 N(7)   N  0.9927(2)   0.0532(4)   -0.4263(6)  0.044(1)    Uani 1.00 d . . .
 N(8)   N  0.8241(2)   0.1164(4)   -0.4076(6)  0.049(1)    Uani 1.00 d . . .
 N(9)   N  0.9025(2)   -0.0451(5)  -0.3011(6)  0.048(1)    Uani 1.00 d . . .
 N(10)  N  0.9170(3)   -0.2673(4)  -0.3752(7)  0.056(1)    Uani 1.00 d . . .
 C(1)   C  0.8471(3)   -0.2340(5)  -0.6677(7)  0.061(2)    Uani 1.00 d . . .
 C(2)   C  0.9163(3)   -0.2763(5)  -0.6530(7)  0.055(1)    Uani 1.00 d . . .
 C(3)   C  0.9697(3)   -0.2010(6)  -0.6466(7)  0.065(2)    Uani 1.00 d . . .
 C(4)   C  1.0275(4)   -0.2415(8)  -0.6246(7)  0.081(2)    Uani 1.00 d . . .
 C(5)   C  1.0315(4)   -0.3554(8)  -0.6112(8)  0.085(2)    Uani 1.00 d . . .
 C(6)   C  0.9777(3)   -0.4249(7)  -0.6202(7)  0.076(2)    Uani 1.00 d . . .
 C(7)   C  0.7388(4)   -0.3105(6)  -0.6890(7)  0.063(2)    Uani 1.00 d . . .
 C(8)   C  0.7163(3)   -0.3631(5)  -0.6339(7)  0.051(1)    Uani 1.00 d . . .
 C(9)   C  0.6594(3)   -0.3272(6)  -0.6074(7)  0.066(2)    Uani 1.00 d . . .
 C(10)  C  0.6383(4)   -0.3873(7)  -0.5606(7)  0.073(2)    Uani 1.00 d . . .
 C(11)  C  0.6757(4)   -0.4808(8)  -0.5433(7)  0.067(2)    Uani 1.00 d . . .
 C(12)  C  0.7320(3)   -0.5090(6)  -0.5719(7)  0.053(2)    Uani 1.00 d . . .
 C(13)  C  0.8283(4)   -0.3398(7)  -0.7570(7)  0.069(2)    Uani 1.00 d . . .
 C(14)  C  0.8109(4)   -0.4524(6)  -0.7797(6)  0.062(2)    Uani 1.00 d . . .
 C(15)  C  0.9051(4)   -0.578(1)   -0.7578(7)  0.082(3)    Uani 1.00 d . . .
 C(16)  C  0.7923(3)   -0.6495(5)  -0.7515(6)  0.056(2)    Uani 1.00 d . . .
 C(17)  C  0.7707(3)   -0.7080(5)  -0.6986(7)  0.051(2)    Uani 1.00 d . . .
 C(18)  C  0.8635(2)   -0.7238(4)  -0.6318(6)  0.039(1)    Uani 1.00 d . . .
 C(19)  C  0.9098(3)   -0.7999(5)  -0.5984(7)  0.053(1)    Uani 1.00 d . . .
 C(20)  C  0.9196(8)   -0.747(1)   -0.5408(7)  0.117(4)    Uani 1.00 d . . .
 C(21)  C  0.9746(4)   -0.799(1)   -0.6278(10) 0.137(5)    Uani 1.00 d . . .
 C(22)  C  0.8843(6)   -0.9231(6)  -0.5938(8)  0.108(3)    Uani 1.00 d . . .
 C(23)  C  1.0043(3)   0.1944(6)   -0.3532(7)  0.055(2)    Uani 1.00 d . . .
 C(24)  C  1.0281(3)   0.1436(5)   -0.4069(7)  0.051(1)    Uani 1.00 d . . .
 C(25)  C  1.0847(3)   0.1788(7)   -0.4343(7)  0.067(2)    Uani 1.00 d . . .
 C(26)  C  1.1068(3)   0.1198(8)   -0.4799(7)  0.073(2)    Uani 1.00 d . . .
 C(27)  C  1.0711(4)   0.0271(8)   -0.4995(7)  0.069(2)    Uani 1.00 d . . .
 C(28)  C  1.0135(4)   -0.0052(6)  -0.4721(7)  0.054(2)    Uani 1.00 d . . .
 C(29)  C  0.8969(3)   0.2676(5)   -0.3767(7)  0.055(2)    Uani 1.00 d . . .
 C(30)  C  0.8278(3)   0.2295(5)   -0.3935(7)  0.051(1)    Uani 1.00 d . . .
 C(31)  C  0.7736(3)   0.3016(6)   -0.3998(7)  0.064(2)    Uani 1.00 d . . .
 C(32)  C  0.7164(4)   0.2637(8)   -0.4211(7)  0.083(2)    Uani 1.00 d . . .
 C(33)  C  0.7117(4)   0.1475(9)   -0.4353(8)  0.100(3)    Uani 1.00 d . . .
 C(34)  C  0.7657(3)   0.0773(7)   -0.4286(7)  0.072(2)    Uani 1.00 d . . .
 C(35)  C  0.9090(4)   0.1668(6)   -0.2877(7)  0.062(2)    Uani 1.00 d . . .
 C(36)  C  0.9267(4)   0.0490(6)   -0.2641(6)  0.059(2)    Uani 1.00 d . . .
 C(37)  C  0.8324(4)   -0.0702(10) -0.2901(7)  0.084(3)    Uani 1.00 d . . .
 C(38)  C  0.9458(5)   -0.1491(6)  -0.2917(7)  0.073(2)    Uani 1.00 d . . .
 C(39)  C  0.9674(3)   -0.2089(6)  -0.3419(7)  0.060(2)    Uani 1.00 d . . .
 C(40)  C  0.8812(3)   -0.2221(4)  -0.4143(6)  0.042(1)    Uani 1.00 d . . .
 C(41)  C  0.8357(3)   -0.2983(5)  -0.4490(7)  0.057(2)    Uani 1.00 d . . .
 C(42)  C  0.8603(6)   -0.4189(7)  -0.4537(8)  0.116(4)    Uani 1.00 d . . .
 C(43)  C  0.8268(10)  -0.246(1)   -0.5055(8)  0.139(5)    Uani 1.00 d . . .
 C(44)  C  0.7696(5)   -0.304(2)   -0.4138(10) 0.139(5)    Uani 1.00 d . . .
 H(1)   H  0.8290      -0.8493     -0.6776     0.0608      Uiso 1.21 calc P . .
 H(2)   H  0.9098      -0.3466     -0.3695     0.0686      Uiso 0.71 calc P . .
 H(3)   H  0.8497      -0.1694     -0.6940     0.0738      Uiso 0.92 calc P . .
 H(4)   H  0.8232      -0.2144     -0.6371     0.0738      Uiso 0.51 calc P . .
 H(5)   H  0.9658      -0.1226     -0.6588     0.0780      Uiso 0.85 calc P . .
 H(6)   H  1.0644      -0.1917     -0.6210     0.0977      Uiso 0.97 calc P . .
 H(7)   H  1.0714      -0.3851     -0.5974     0.1051      Uiso 1.04 calc P . .
 H(8)   H  0.9815      -0.5048     -0.6124     0.0912      Uiso 0.69 calc P . .
 H(9)   H  0.7299      -0.2303     -0.6899     0.0752      Uiso 1.38 calc P . .
 H(10)  H  0.7149      -0.3455     -0.7200     0.0752      Uiso 1.03 calc P . .
 H(11)  H  0.6351      -0.2625     -0.6220     0.0802      Uiso 1.18 calc P . .
 H(12)  H  0.5997      -0.3637     -0.5427     0.0877      Uiso 1.19 calc P . .
 H(13)  H  0.6611      -0.5249     -0.5130     0.0821      Uiso 1.02 calc P . .
 H(14)  H  0.7577      -0.5742     -0.5630     0.0636      Uiso 1.20 calc P . .
 H(15)  H  0.8046      -0.2821     -0.7787     0.0842      Uiso 0.47 calc P . .
 H(16)  H  0.8745      -0.3275     -0.7628     0.0842      Uiso 0.38 calc P . .
 H(17)  H  0.8304      -0.4601     -0.8177     0.0744      Uiso 0.79 calc P . .
 H(18)  H  0.7641      -0.4585     -0.7847     0.0744      Uiso 0.60 calc P . .
 H(19)  H  0.9202      -0.6383     -0.7360     0.0982      Uiso 1.03 calc P . .
 H(20)  H  0.9076      -0.6023     -0.7976     0.0982      Uiso 0.97 calc P . .
 H(21)  H  0.9321      -0.5121     -0.7545     0.0982      Uiso 0.79 calc P . .
 H(22)  H  0.7535      -0.6252     -0.7727     0.0668      Uiso 0.64 calc P . .
 H(23)  H  0.8153      -0.7046     -0.7754     0.0668      Uiso 0.22 calc P . .
 H(24)  H  0.7368      -0.7616     -0.7094     0.0604      Uiso 1.27 calc P . .
 H(25)  H  0.7529      -0.6507     -0.6760     0.0604      Uiso 0.95 calc P . .
 H(26)  H  0.9474      -0.7958     -0.5203     0.1472      Uiso 0.38 calc P . .
 H(27)  H  0.9374      -0.6735     -0.5448     0.1472      Uiso -0.14 calc P . .
 H(28)  H  0.8768      -0.7430     -0.5235     0.1472      Uiso 1.86 calc P . .
 H(29)  H  1.0053      -0.8482     -0.6113     0.1549      Uiso 1.26 calc P . .
 H(30)  H  0.9677      -0.8311     -0.6674     0.1549      Uiso 0.51 calc P . .
 H(31)  H  0.9914      -0.7251     -0.6334     0.1549      Uiso 0.62 calc P . .
 H(32)  H  0.8435      -0.9239     -0.5754     0.1303      Uiso 0.29 calc P . .
 H(33)  H  0.8781      -0.9544     -0.6314     0.1303      Uiso 0.90 calc P . .
 H(34)  H  0.9161      -0.9683     -0.5754     0.1303      Uiso 0.70 calc P . .
 H(35)  H  1.0131      0.2747      -0.3550     0.0673      Uiso 0.92 calc P . .
 H(36)  H  1.0276      0.1598      -0.3245     0.0673      Uiso 0.50 calc P . .
 H(37)  H  1.1081      0.2442      -0.4223     0.0805      Uiso 1.05 calc P . .
 H(38)  H  1.1468      0.1417      -0.5000     0.0881      Uiso 1.22 calc P . .
 H(39)  H  1.0854      -0.0146     -0.5327     0.0802      Uiso 1.56 calc P . .
 H(40)  H  0.9886      -0.0677     -0.4889     0.0645      Uiso 0.66 calc P . .
 H(41)  H  0.8931      0.3335      -0.3551     0.0656      Uiso 1.02 calc P . .
 H(42)  H  0.9210      0.2874      -0.4113     0.0656      Uiso 1.12 calc P . .
 H(43)  H  0.7771      0.3796      -0.3900     0.0775      Uiso 0.89 calc P . .
 H(44)  H  0.6802      0.3138      -0.4286     0.0976      Uiso 1.22 calc P . .
 H(45)  H  0.6713      0.1168      -0.4513     0.1146      Uiso 1.01 calc P . .
 H(46)  H  0.7625      -0.0004     -0.4405     0.0877      Uiso 0.96 calc P . .
 H(47)  H  0.9304      0.2245      -0.2678     0.0749      Uiso 1.40 calc P . .
 H(48)  H  0.8624      0.1773      -0.2877     0.0749      Uiso 0.93 calc P . .
 H(49)  H  0.9065      0.0414      -0.2300     0.0705      Uiso 0.70 calc P . .
 H(50)  H  0.9734      0.0439      -0.2622     0.0705      Uiso 0.88 calc P . .
 H(51)  H  0.8067      -0.0023     -0.2991     0.1019      Uiso 0.96 calc P . .
 H(52)  H  0.8177      -0.1299     -0.3156     0.1019      Uiso 1.51 calc P . .
 H(53)  H  0.8268      -0.0916     -0.2539     0.1019      Uiso -0.03 calc P . .
 H(54)  H  0.9835      -0.1246     -0.2729     0.0898      Uiso 1.32 calc P . .
 H(55)  H  0.9206      -0.2014     -0.2708     0.0898      Uiso 1.45 calc P . .
 H(56)  H  0.9988      -0.2655     -0.3322     0.0729      Uiso 0.98 calc P . .
 H(57)  H  0.9885      -0.1542     -0.3669     0.0729      Uiso 1.12 calc P . .
 H(58)  H  0.8284      -0.4651     -0.4734     0.1414      Uiso 0.61 calc P . .
 H(59)  H  0.9009      -0.4203     -0.4745     0.1414      Uiso 0.43 calc P . .
 H(60)  H  0.8671      -0.4486     -0.4179     0.1414      Uiso 1.34 calc P . .
 H(61)  H  0.8691      -0.2393     -0.5247     0.1674      Uiso 1.57 calc P . .
 H(62)  H  0.7987      -0.2925     -0.5291     0.1674      Uiso 1.61 calc P . .
 H(63)  H  0.8080      -0.1713     -0.5031     0.1674      Uiso 1.21 calc P . .
 H(64)  H  0.7524      -0.2271     -0.4131     0.1726      Uiso 0.84 calc P . .
 H(65)  H  0.7382      -0.3489     -0.4366     0.1726      Uiso 0.82 calc P . .
 H(66)  H  0.7775      -0.3348     -0.3812     0.1726      Uiso 0.28 calc P . .

loop_
_atom_site_aniso_label
_atom_site_aniso_U_11
_atom_site_aniso_U_22
_atom_site_aniso_U_33
_atom_site_aniso_U_12
_atom_site_aniso_U_13
_atom_site_aniso_U_23
 Cu(1)  0.0483(3)   0.0328(3)   0.0377(3)   -0.0029(3)  -0.0033(3)  0.0049(4)  
 Cu(2)  0.0476(3)   0.0321(2)   0.0358(3)   -0.0035(3)  0.0011(2)   -0.0014(4) 
 Cl(1)  0.0655(8)   0.0457(7)   0.068(1)    0.0004(6)   0.0204(8)   0.0029(7)  
 Cl(2)  0.0562(8)   0.0614(9)   0.0485(10)  -0.0018(6)  0.0051(7)   0.0056(7)  
 Cl(3)  0.0543(7)   0.0464(8)   0.0553(9)   0.0054(5)   -0.0078(6)  -0.0025(5) 
 Cl(4)  0.0546(7)   0.0596(9)   0.053(1)    0.0041(6)   -0.0033(7)  -0.0086(7) 
 O(1)   0.058(2)    0.034(1)    0.052(2)    -0.001(2)   -0.011(2)   0.002(1)   
 O(2)   0.069(2)    0.031(1)    0.043(2)    0.001(2)    -0.016(2)   0.000(1)   
 O(3)   0.095(4)    0.142(6)    0.111(5)    -0.038(4)   0.043(4)    0.040(5)   
 O(4)   0.123(6)    0.22(1)     0.102(6)    -0.047(6)   -0.042(4)   0.065(6)   
 O(5)   0.090(4)    0.069(4)    0.198(8)    0.013(3)    0.039(4)    -0.051(5)  
 O(6)   0.112(5)    0.049(3)    0.160(6)    -0.005(3)   0.011(4)    -0.024(3)  
 O(7)   0.083(3)    0.089(4)    0.074(4)    -0.018(3)   0.038(3)    -0.017(3)  
 O(8)   0.081(4)    0.170(7)    0.110(5)    -0.004(4)   -0.028(3)   0.094(5)   
 O(9)   0.138(6)    0.078(3)    0.117(5)    0.021(4)    0.026(4)    -0.027(4)  
 O(10)  0.064(3)    0.134(6)    0.083(4)    -0.030(3)   -0.019(3)   0.030(4)   
 O(11)  0.069(3)    0.096(4)    0.087(4)    0.018(3)    -0.031(3)   0.021(3)   
 O(12)  0.095(4)    0.120(5)    0.069(3)    -0.007(4)   0.014(3)    0.028(4)   
 O(13)  0.119(4)    0.049(3)    0.105(4)    0.021(3)    -0.012(3)   -0.029(3)  
 O(14)  0.061(2)    0.069(3)    0.094(4)    -0.006(2)   -0.013(2)   -0.023(3)  
 O(15)  0.098(4)    0.132(6)    0.091(4)    0.004(4)    0.025(3)    -0.060(4)  
 O(16)  0.085(3)    0.082(4)    0.062(3)    -0.006(2)   -0.029(3)   -0.003(3)  
 O(17)  0.132(6)    0.082(4)    0.185(8)    0.013(4)    -0.020(6)   0.071(5)   
 O(18)  0.060(2)    0.129(5)    0.083(4)    -0.019(3)   0.011(3)    -0.012(4)  
 N(1)   0.065(2)    0.035(2)    0.051(2)    -0.004(2)   -0.012(2)   0.014(2)   
 N(2)   0.047(2)    0.037(2)    0.059(3)    -0.005(2)   0.000(2)    0.001(2)   
 N(3)   0.054(2)    0.039(2)    0.041(2)    0.000(2)    -0.006(2)   -0.001(2)  
 N(4)   0.051(2)    0.048(2)    0.037(2)    0.005(2)    0.002(2)    0.006(2)   
 N(5)   0.062(3)    0.030(2)    0.060(3)    0.000(2)    -0.019(2)   -0.003(2)  
 N(6)   0.053(2)    0.035(2)    0.045(2)    -0.004(2)   -0.001(2)   -0.002(2)  
 N(7)   0.046(2)    0.046(2)    0.040(2)    0.002(2)    0.005(2)    0.004(2)   
 N(8)   0.049(2)    0.045(2)    0.052(3)    0.004(2)    -0.007(2)   0.001(2)   
 N(9)   0.062(2)    0.048(2)    0.033(2)    -0.010(2)   0.004(2)    0.003(2)   
 N(10)  0.062(3)    0.032(2)    0.074(4)    0.001(2)    -0.027(2)   0.001(2)   
 C(1)   0.067(3)    0.038(3)    0.079(5)    -0.004(2)   0.000(3)    -0.002(3)  
 C(2)   0.065(3)    0.036(2)    0.063(4)    -0.014(2)   -0.013(3)   0.005(3)   
 C(3)   0.063(3)    0.046(3)    0.086(5)    -0.015(2)   -0.002(3)   -0.005(3)  
 C(4)   0.060(4)    0.076(4)    0.107(6)    -0.020(3)   -0.014(4)   0.005(4)   
 C(5)   0.051(3)    0.077(4)    0.128(7)    -0.003(3)   -0.030(4)   -0.002(5)  
 C(6)   0.050(3)    0.070(5)    0.109(6)    -0.003(3)   -0.029(4)   0.007(4)   
 C(7)   0.070(3)    0.054(4)    0.064(4)    0.010(3)    0.002(3)    0.013(3)   
 C(8)   0.057(3)    0.040(3)    0.055(3)    0.001(2)    -0.005(2)   -0.004(2)  
 C(9)   0.059(3)    0.056(4)    0.084(4)    0.012(3)    0.002(3)    -0.012(3)  
 C(10)  0.064(4)    0.079(5)    0.075(4)    -0.006(3)   0.010(3)    -0.019(3)  
 C(11)  0.059(3)    0.085(4)    0.057(4)    -0.007(3)   0.010(3)    -0.014(4)  
 C(12)  0.052(3)    0.059(4)    0.049(4)    -0.013(2)   0.001(3)    0.007(2)   
 C(13)  0.099(5)    0.057(3)    0.052(3)    -0.001(3)   0.003(3)    0.017(3)   
 C(14)  0.086(4)    0.061(3)    0.038(3)    -0.001(3)   -0.015(3)   0.017(2)   
 C(15)  0.059(3)    0.124(8)    0.064(5)    0.027(4)    0.018(3)    0.006(5)   
 C(16)  0.080(4)    0.045(3)    0.044(3)    0.004(2)    -0.020(3)   -0.001(2)  
 C(17)  0.052(3)    0.038(3)    0.064(3)    -0.004(2)   -0.015(2)   0.008(2)   
 C(18)  0.045(2)    0.032(2)    0.042(3)    0.003(2)    0.001(2)    0.002(2)   
 C(19)  0.061(3)    0.037(2)    0.061(3)    0.002(2)    -0.016(2)   0.011(2)   
 C(20)  0.19(1)     0.083(7)    0.074(5)    0.056(7)    -0.063(7)   -0.014(4)  
 C(21)  0.049(4)    0.17(1)     0.19(1)     0.039(5)    0.022(5)    0.11(1)    
 C(22)  0.133(8)    0.036(3)    0.156(9)    -0.015(4)   -0.089(7)   0.027(5)   
 C(23)  0.054(2)    0.049(3)    0.062(3)    -0.015(3)   -0.004(3)   -0.001(3)  
 C(24)  0.051(3)    0.049(3)    0.053(3)    -0.006(2)   -0.006(2)   0.016(2)   
 C(25)  0.049(3)    0.068(4)    0.084(4)    -0.012(3)   -0.001(3)   0.022(3)   
 C(26)  0.047(3)    0.082(4)    0.089(5)    -0.001(3)   0.022(3)    0.026(3)   
 C(27)  0.066(3)    0.073(4)    0.067(5)    0.014(3)    0.024(3)    0.011(4)   
 C(28)  0.060(3)    0.062(5)    0.040(3)    0.009(3)    0.006(3)    0.000(2)   
 C(29)  0.067(3)    0.036(3)    0.063(4)    0.003(2)    -0.002(3)   -0.004(3)  
 C(30)  0.061(2)    0.043(2)    0.050(3)    0.007(2)    0.011(2)    0.002(2)   
 C(31)  0.072(3)    0.046(3)    0.074(4)    0.023(2)    0.010(3)    0.008(3)   
 C(32)  0.058(3)    0.076(4)    0.116(7)    0.022(3)    0.005(3)    0.035(4)   
 C(33)  0.062(4)    0.085(5)    0.152(9)    0.011(4)    -0.043(5)   -0.003(6)  
 C(34)  0.052(3)    0.058(4)    0.108(6)    -0.009(2)   -0.020(3)   -0.006(4)  
 C(35)  0.093(5)    0.050(3)    0.044(3)    -0.002(3)   0.007(3)    -0.004(3)  
 C(36)  0.084(4)    0.049(3)    0.045(3)    -0.006(3)   -0.008(3)   -0.004(2)  
 C(37)  0.070(3)    0.117(7)    0.064(4)    -0.040(5)   0.015(3)    0.007(5)   
 C(38)  0.118(6)    0.042(3)    0.060(3)    0.003(3)    -0.029(4)   0.015(3)   
 C(39)  0.064(4)    0.043(3)    0.073(4)    -0.001(3)   -0.031(3)   0.004(3)   
 C(40)  0.045(2)    0.030(2)    0.052(3)    -0.003(2)   0.000(2)    -0.002(2)  
 C(41)  0.064(3)    0.041(3)    0.065(3)    -0.005(2)   -0.028(2)   -0.004(3)  
 C(42)  0.147(9)    0.043(4)    0.156(9)    0.013(4)    -0.097(8)   -0.039(5)  
 C(43)  0.25(1)     0.104(9)    0.064(5)    -0.075(9)   -0.078(8)   0.016(5)   
 C(44)  0.059(5)    0.18(1)     0.18(1)     -0.050(6)   0.024(5)    -0.07(1)   
#------------------------------------------------------------------------------
_computing_data_collection            'CRYSTALCLEAR'
_computing_cell_refinement            'CRYSTALCLEAR'
_computing_data_reduction             'teXsan Ver. 1.11'
_computing_structure_solution          SIR92
_computing_structure_refinement       'teXsan Ver. 1.10'
_computing_publication_material       'teXsan Ver. 1.11'
_computing_molecular_graphics          ?
#------------------------------------------------------------------------------
_geom_special_details
;
 ?
;
loop_
_geom_bond_atom_site_label_1
_geom_bond_atom_site_label_2
_geom_bond_distance
_geom_bond_site_symmetry_1
_geom_bond_site_symmetry_2
_geom_bond_publ_flag
 Cu(1)     O(1)      1.929(5)   . . yes
 Cu(1)     N(1)      2.029(6)   . . yes
 Cu(1)     N(2)      2.095(6)   . . yes
 Cu(1)     N(3)      2.041(6)   . . yes
 Cu(1)     N(4)      2.127(7)   . . yes
 Cu(2)     O(2)      1.963(4)   . . yes
 Cu(2)     N(6)      2.001(6)   . . yes
 Cu(2)     N(7)      2.043(5)   . . yes
 Cu(2)     N(8)      2.109(6)   . . yes
 Cu(2)     N(9)      2.081(6)   . . yes
 Cl(1)     O(3)      1.430(7)   . . yes
 Cl(1)     O(4)      1.38(1)    . . yes
 Cl(1)     O(5)      1.379(7)   . . yes
 Cl(1)     O(6)      1.427(7)   . . yes
 Cl(2)     O(7)      1.403(8)   . . yes
 Cl(2)     O(8)      1.405(7)   . . yes
 Cl(2)     O(9)      1.387(9)   . . yes
 Cl(2)     O(10)     1.432(7)   . . yes
 Cl(3)     O(11)     1.393(6)   . . yes
 Cl(3)     O(12)     1.462(8)   . . yes
 Cl(3)     O(13)     1.417(6)   . . yes
 Cl(3)     O(14)     1.434(6)   . . yes
 Cl(4)     O(15)     1.424(7)   . . yes
 Cl(4)     O(16)     1.440(8)   . . yes
 Cl(4)     O(17)     1.396(8)   . . yes
 Cl(4)     O(18)     1.430(7)   . . yes
 O(1)      C(18)     1.256(8)   . . yes
 O(2)      C(40)     1.270(8)   . . yes
 N(1)      C(1)      1.50(1)    . . yes
 N(1)      C(7)      1.49(1)    . . yes
 N(1)      C(13)     1.46(1)    . . yes
 N(2)      C(2)      1.332(9)   . . yes
 N(2)      C(6)      1.30(1)    . . yes
 N(3)      C(8)      1.325(9)   . . yes
 N(3)      C(12)     1.32(1)    . . yes
 N(4)      C(14)     1.501(10)  . . yes
 N(4)      C(15)     1.481(10)  . . yes
 N(4)      C(16)     1.46(1)    . . yes
 N(5)      C(17)     1.475(9)   . . yes
 N(5)      C(18)     1.299(9)   . . yes
 N(6)      C(23)     1.49(1)    . . yes
 N(6)      C(29)     1.48(1)    . . yes
 N(6)      C(35)     1.48(1)    . . yes
 N(7)      C(24)     1.352(10)  . . yes
 N(7)      C(28)     1.36(1)    . . yes
 N(8)      C(30)     1.359(10)  . . yes
 N(8)      C(34)     1.359(10)  . . yes
 N(9)      C(36)     1.49(1)    . . yes
 N(9)      C(37)     1.47(1)    . . yes
 N(9)      C(38)     1.51(1)    . . yes
 N(10)     C(39)     1.458(10)  . . yes
 N(10)     C(40)     1.294(10)  . . yes
 C(1)      C(2)      1.52(1)    . . yes
 C(2)      C(3)      1.39(1)    . . yes
 C(3)      C(4)      1.36(1)    . . yes
 C(4)      C(5)      1.37(2)    . . yes
 C(5)      C(6)      1.37(1)    . . yes
 C(7)      C(8)      1.52(1)    . . yes
 C(8)      C(9)      1.37(1)    . . yes
 C(9)      C(10)     1.38(1)    . . yes
 C(10)     C(11)     1.39(1)    . . yes
 C(11)     C(12)     1.37(1)    . . yes
 C(13)     C(14)     1.46(1)    . . yes
 C(16)     C(17)     1.50(1)    . . yes
 C(18)     C(19)     1.514(9)   . . yes
 C(19)     C(20)     1.52(1)    . . yes
 C(19)     C(21)     1.48(1)    . . yes
 C(19)     C(22)     1.53(1)    . . yes
 C(23)     C(24)     1.49(1)    . . yes
 C(24)     C(25)     1.38(1)    . . yes
 C(25)     C(26)     1.36(1)    . . yes
 C(26)     C(27)     1.38(2)    . . yes
 C(27)     C(28)     1.38(1)    . . yes
 C(29)     C(30)     1.51(1)    . . yes
 C(30)     C(31)     1.39(1)    . . yes
 C(31)     C(32)     1.34(1)    . . yes
 C(32)     C(33)     1.40(2)    . . yes
 C(33)     C(34)     1.37(1)    . . yes
 C(35)     C(36)     1.52(1)    . . yes
 C(38)     C(39)     1.46(1)    . . yes
 C(40)     C(41)     1.519(9)   . . yes
 C(41)     C(42)     1.49(1)    . . yes
 C(41)     C(43)     1.49(1)    . . yes
 C(41)     C(44)     1.58(2)    . . yes
#------------------------------------------------------------------------------
loop_
_geom_angle_atom_site_label_1
_geom_angle_atom_site_label_2
_geom_angle_atom_site_label_3
_geom_angle
_geom_angle_site_symmetry_1
_geom_angle_site_symmetry_2
_geom_angle_site_symmetry_3
_geom_angle_publ_flag
   O(1)      Cu(1)     N(1)      175.1(2)   . . . yes
   O(1)      Cu(1)     N(2)      93.7(2)    . . . yes
   O(1)      Cu(1)     N(3)      97.7(2)    . . . yes
   O(1)      Cu(1)     N(4)      97.7(2)    . . . yes
   N(1)      Cu(1)     N(2)      81.9(2)    . . . yes
   N(1)      Cu(1)     N(3)      82.7(3)    . . . yes
   N(1)      Cu(1)     N(4)      86.1(3)    . . . yes
   N(2)      Cu(1)     N(3)      117.3(2)   . . . yes
   N(2)      Cu(1)     N(4)      115.6(2)   . . . yes
   N(3)      Cu(1)     N(4)      123.4(2)   . . . yes
   O(2)      Cu(2)     N(6)      172.9(2)   . . . yes
   O(2)      Cu(2)     N(7)      97.2(2)    . . . yes
   O(2)      Cu(2)     N(8)      91.9(2)    . . . yes
   O(2)      Cu(2)     N(9)      98.0(2)    . . . yes
   N(6)      Cu(2)     N(7)      82.6(2)    . . . yes
   N(6)      Cu(2)     N(8)      81.9(2)    . . . yes
   N(6)      Cu(2)     N(9)      87.7(3)    . . . yes
   N(7)      Cu(2)     N(8)      115.1(2)   . . . yes
   N(7)      Cu(2)     N(9)      126.6(2)   . . . yes
   N(8)      Cu(2)     N(9)      115.2(2)   . . . yes
   O(3)      Cl(1)     O(4)      108.4(6)   . . . yes
   O(3)      Cl(1)     O(5)      111.4(7)   . . . yes
   O(3)      Cl(1)     O(6)      107.1(6)   . . . yes
   O(4)      Cl(1)     O(5)      110.8(9)   . . . yes
   O(4)      Cl(1)     O(6)      111.3(7)   . . . yes
   O(5)      Cl(1)     O(6)      107.8(5)   . . . yes
   O(7)      Cl(2)     O(8)      108.1(6)   . . . yes
   O(7)      Cl(2)     O(9)      110.1(5)   . . . yes
   O(7)      Cl(2)     O(10)     110.9(6)   . . . yes
   O(8)      Cl(2)     O(9)      108.0(7)   . . . yes
   O(8)      Cl(2)     O(10)     109.1(5)   . . . yes
   O(9)      Cl(2)     O(10)     110.7(6)   . . . yes
   O(11)     Cl(3)     O(12)     108.2(5)   . . . yes
   O(11)     Cl(3)     O(13)     111.0(5)   . . . yes
   O(11)     Cl(3)     O(14)     110.4(5)   . . . yes
   O(12)     Cl(3)     O(13)     109.7(5)   . . . yes
   O(12)     Cl(3)     O(14)     109.1(5)   . . . yes
   O(13)     Cl(3)     O(14)     108.3(5)   . . . yes
   O(15)     Cl(4)     O(16)     107.8(5)   . . . yes
   O(15)     Cl(4)     O(17)     110.6(7)   . . . yes
   O(15)     Cl(4)     O(18)     109.5(5)   . . . yes
   O(16)     Cl(4)     O(17)     110.0(6)   . . . yes
   O(16)     Cl(4)     O(18)     110.7(5)   . . . yes
   O(17)     Cl(4)     O(18)     108.3(6)   . . . yes
   Cu(1)     O(1)      C(18)     136.5(4)   . . . yes
   Cu(2)     O(2)      C(40)     135.7(4)   . . . yes
   Cu(1)     N(1)      C(1)      108.4(5)   . . . yes
   Cu(1)     N(1)      C(7)      108.0(5)   . . . yes
   Cu(1)     N(1)      C(13)     106.1(6)   . . . yes
   C(1)      N(1)      C(7)      107.4(7)   . . . yes
   C(1)      N(1)      C(13)     114.6(7)   . . . yes
   C(7)      N(1)      C(13)     112.1(7)   . . . yes
   Cu(1)     N(2)      C(2)      112.2(5)   . . . yes
   Cu(1)     N(2)      C(6)      128.8(6)   . . . yes
   C(2)      N(2)      C(6)      118.8(7)   . . . yes
   Cu(1)     N(3)      C(8)      114.5(5)   . . . yes
   Cu(1)     N(3)      C(12)     126.8(5)   . . . yes
   C(8)      N(3)      C(12)     118.7(7)   . . . yes
   Cu(1)     N(4)      C(14)     104.2(5)   . . . yes
   Cu(1)     N(4)      C(15)     106.4(6)   . . . yes
   Cu(1)     N(4)      C(16)     114.9(5)   . . . yes
   C(14)     N(4)      C(15)     110.7(7)   . . . yes
   C(14)     N(4)      C(16)     109.5(6)   . . . yes
   C(15)     N(4)      C(16)     110.9(8)   . . . yes
   C(17)     N(5)      C(18)     125.4(6)   . . . yes
   Cu(2)     N(6)      C(23)     109.0(5)   . . . yes
   Cu(2)     N(6)      C(29)     109.4(5)   . . . yes
   Cu(2)     N(6)      C(35)     106.0(5)   . . . yes
   C(23)     N(6)      C(29)     107.0(6)   . . . yes
   C(23)     N(6)      C(35)     114.2(6)   . . . yes
   C(29)     N(6)      C(35)     111.1(7)   . . . yes
   Cu(2)     N(7)      C(24)     113.2(5)   . . . yes
   Cu(2)     N(7)      C(28)     126.5(6)   . . . yes
   C(24)     N(7)      C(28)     120.3(6)   . . . yes
   Cu(2)     N(8)      C(30)     112.4(5)   . . . yes
   Cu(2)     N(8)      C(34)     129.3(6)   . . . yes
   C(30)     N(8)      C(34)     117.6(7)   . . . yes
   Cu(2)     N(9)      C(36)     104.6(5)   . . . yes
   Cu(2)     N(9)      C(37)     107.1(6)   . . . yes
   Cu(2)     N(9)      C(38)     114.2(5)   . . . yes
   C(36)     N(9)      C(37)     110.8(8)   . . . yes
   C(36)     N(9)      C(38)     108.2(7)   . . . yes
   C(37)     N(9)      C(38)     111.7(8)   . . . yes
   C(39)     N(10)     C(40)     126.5(7)   . . . yes
   N(1)      C(1)      C(2)      108.3(6)   . . . yes
   N(2)      C(2)      C(1)      116.3(6)   . . . yes
   N(2)      C(2)      C(3)      121.3(7)   . . . yes
   C(1)      C(2)      C(3)      122.0(7)   . . . yes
   C(2)      C(3)      C(4)      119.0(9)   . . . yes
   C(3)      C(4)      C(5)      118.4(9)   . . . yes
   C(4)      C(5)      C(6)      119.3(9)   . . . yes
   N(2)      C(6)      C(5)      123.1(10)  . . . yes
   N(1)      C(7)      C(8)      110.9(6)   . . . yes
   N(3)      C(8)      C(7)      115.1(7)   . . . yes
   N(3)      C(8)      C(9)      122.9(8)   . . . yes
   C(7)      C(8)      C(9)      121.8(8)   . . . yes
   C(8)      C(9)      C(10)     118.4(9)   . . . yes
   C(9)      C(10)     C(11)     118.1(9)   . . . yes
   C(10)     C(11)     C(12)     119(1)     . . . yes
   N(3)      C(12)     C(11)     122.5(9)   . . . yes
   N(1)      C(13)     C(14)     112.5(7)   . . . yes
   N(4)      C(14)     C(13)     112.6(6)   . . . yes
   N(4)      C(16)     C(17)     115.4(6)   . . . yes
   N(5)      C(17)     C(16)     115.4(7)   . . . yes
   O(1)      C(18)     N(5)      122.2(6)   . . . yes
   O(1)      C(18)     C(19)     118.1(6)   . . . yes
   N(5)      C(18)     C(19)     119.7(6)   . . . yes
   C(18)     C(19)     C(20)     108.6(7)   . . . yes
   C(18)     C(19)     C(21)     106.7(8)   . . . yes
   C(18)     C(19)     C(22)     112.3(7)   . . . yes
   C(20)     C(19)     C(21)     108(1)     . . . yes
   C(20)     C(19)     C(22)     111(1)     . . . yes
   C(21)     C(19)     C(22)     109(1)     . . . yes
   N(6)      C(23)     C(24)     110.1(6)   . . . yes
   N(7)      C(24)     C(23)     115.7(6)   . . . yes
   N(7)      C(24)     C(25)     120.3(8)   . . . yes
   C(23)     C(24)     C(25)     123.9(8)   . . . yes
   C(24)     C(25)     C(26)     120.1(9)   . . . yes
   C(25)     C(26)     C(27)     119.7(8)   . . . yes
   C(26)     C(27)     C(28)     119.3(10)  . . . yes
   N(7)      C(28)     C(27)     120.3(9)   . . . yes
   N(6)      C(29)     C(30)     110.3(6)   . . . yes
   N(8)      C(30)     C(29)     113.5(6)   . . . yes
   N(8)      C(30)     C(31)     121.1(8)   . . . yes
   C(29)     C(30)     C(31)     125.1(8)   . . . yes
   C(30)     C(31)     C(32)     121.4(9)   . . . yes
   C(31)     C(32)     C(33)     118.2(8)   . . . yes
   C(32)     C(33)     C(34)     119.6(9)   . . . yes
   N(8)      C(34)     C(33)     122.1(9)   . . . yes
   N(6)      C(35)     C(36)     109.3(7)   . . . yes
   N(9)      C(36)     C(35)     111.4(7)   . . . yes
   N(9)      C(38)     C(39)     115.6(7)   . . . yes
   N(10)     C(39)     C(38)     117.6(8)   . . . yes
   O(2)      C(40)     N(10)     122.0(6)   . . . yes
   O(2)      C(40)     C(41)     118.2(6)   . . . yes
   N(10)     C(40)     C(41)     119.6(6)   . . . yes
   C(40)     C(41)     C(42)     113.0(6)   . . . yes
   C(40)     C(41)     C(43)     109.3(7)   . . . yes
   C(40)     C(41)     C(44)     104.2(9)   . . . yes
   C(42)     C(41)     C(43)     110(1)     . . . yes
   C(42)     C(41)     C(44)     106(1)     . . . yes
   C(43)     C(41)     C(44)     113(1)     . . . yes
#------------------------------------------------------------------------------
loop_
_geom_torsion_atom_site_label_1
_geom_torsion_atom_site_label_2
_geom_torsion_atom_site_label_3
_geom_torsion_atom_site_label_4
_geom_torsion
_geom_torsion_site_symmetry_1
_geom_torsion_site_symmetry_2
_geom_torsion_site_symmetry_3
_geom_torsion_site_symmetry_4
_geom_torsion_publ_flag
 Cu(1)     O(1)      C(18)     N(5)      -18(1)     . . . . yes
 Cu(1)     O(1)      C(18)     C(19)     162.1(5)   . . . . yes
 Cu(1)     N(1)      C(1)      C(2)      38.2(9)    . . . . yes
 Cu(1)     N(1)      C(7)      C(8)      32.0(8)    . . . . yes
 Cu(1)     N(1)      C(13)     C(14)     41.2(9)    . . . . yes
 Cu(1)     N(2)      C(2)      C(1)      13.3(10)   . . . . yes
 Cu(1)     N(2)      C(2)      C(3)      -174.3(7)  . . . . yes
 Cu(1)     N(2)      C(6)      C(5)      175.4(9)   . . . . yes
 Cu(1)     N(3)      C(8)      C(7)      7.2(8)     . . . . yes
 Cu(1)     N(3)      C(8)      C(9)      -177.5(6)  . . . . yes
 Cu(1)     N(3)      C(12)     C(11)     178.6(7)   . . . . yes
 Cu(1)     N(4)      C(14)     C(13)     29.3(8)    . . . . yes
 Cu(1)     N(4)      C(16)     C(17)     -16.3(8)   . . . . yes
 Cu(2)     O(2)      C(40)     N(10)     -12(1)     . . . . yes
 Cu(2)     O(2)      C(40)     C(41)     162.6(6)   . . . . yes
 Cu(2)     N(6)      C(23)     C(24)     33.1(7)    . . . . yes
 Cu(2)     N(6)      C(29)     C(30)     37.9(8)    . . . . yes
 Cu(2)     N(6)      C(35)     C(36)     42.2(8)    . . . . yes
 Cu(2)     N(7)      C(24)     C(23)     7.3(8)     . . . . yes
 Cu(2)     N(7)      C(24)     C(25)     -176.7(6)  . . . . yes
 Cu(2)     N(7)      C(28)     C(27)     178.0(7)   . . . . yes
 Cu(2)     N(8)      C(30)     C(29)     15.2(8)    . . . . yes
 Cu(2)     N(8)      C(30)     C(31)     -170.6(6)  . . . . yes
 Cu(2)     N(8)      C(34)     C(33)     169.2(9)   . . . . yes
 Cu(2)     N(9)      C(36)     C(35)     32.2(8)    . . . . yes
 Cu(2)     N(9)      C(38)     C(39)     -19(1)     . . . . yes
 O(1)      Cu(1)     N(1)      C(1)      -1(3)      . . . . yes
 O(1)      Cu(1)     N(1)      C(7)      -117(2)    . . . . yes
 O(1)      Cu(1)     N(1)      C(13)     122(2)     . . . . yes
 O(1)      Cu(1)     N(2)      C(2)      -170.7(6)  . . . . yes
 O(1)      Cu(1)     N(2)      C(6)      14.6(9)    . . . . yes
 O(1)      Cu(1)     N(3)      C(8)      -175.7(5)  . . . . yes
 O(1)      Cu(1)     N(3)      C(12)     3.9(7)     . . . . yes
 O(1)      Cu(1)     N(4)      C(14)     177.9(5)   . . . . yes
 O(1)      Cu(1)     N(4)      C(15)     -65.1(7)   . . . . yes
 O(1)      Cu(1)     N(4)      C(16)     58.1(5)    . . . . yes
 O(1)      C(18)     N(5)      C(17)     -6(1)      . . . . yes
 O(1)      C(18)     C(19)     C(20)     32(1)      . . . . yes
 O(1)      C(18)     C(19)     C(21)     -83(1)     . . . . yes
 O(1)      C(18)     C(19)     C(22)     155(1)     . . . . yes
 O(2)      Cu(2)     N(6)      C(23)     -112(1)    . . . . yes
 O(2)      Cu(2)     N(6)      C(29)     4(2)       . . . . yes
 O(2)      Cu(2)     N(6)      C(35)     124(1)     . . . . yes
 O(2)      Cu(2)     N(7)      C(24)     -177.5(5)  . . . . yes
 O(2)      Cu(2)     N(7)      C(28)     4.3(7)     . . . . yes
 O(2)      Cu(2)     N(8)      C(30)     -171.8(5)  . . . . yes
 O(2)      Cu(2)     N(8)      C(34)     18.2(8)    . . . . yes
 O(2)      Cu(2)     N(9)      C(36)     177.3(5)   . . . . yes
 O(2)      Cu(2)     N(9)      C(37)     -65.1(7)   . . . . yes
 O(2)      Cu(2)     N(9)      C(38)     59.2(6)    . . . . yes
 O(2)      C(40)     N(10)     C(39)     -10(1)     . . . . yes
 O(2)      C(40)     C(41)     C(42)     156(1)     . . . . yes
 O(2)      C(40)     C(41)     C(43)     32(1)      . . . . yes
 O(2)      C(40)     C(41)     C(44)     -89(1)     . . . . yes
 N(1)      Cu(1)     O(1)      C(18)     -164(2)    . . . . yes
 N(1)      Cu(1)     N(2)      C(2)      7.4(6)     . . . . yes
 N(1)      Cu(1)     N(2)      C(6)      -167.4(9)  . . . . yes
 N(1)      Cu(1)     N(3)      C(8)      9.2(5)     . . . . yes
 N(1)      Cu(1)     N(3)      C(12)     -171.2(7)  . . . . yes
 N(1)      Cu(1)     N(4)      C(14)     -5.2(5)    . . . . yes
 N(1)      Cu(1)     N(4)      C(15)     111.8(7)   . . . . yes
 N(1)      Cu(1)     N(4)      C(16)     -125.0(5)  . . . . yes
 N(1)      C(1)      C(2)      N(2)      -34(1)     . . . . yes
 N(1)      C(1)      C(2)      C(3)      153.1(9)   . . . . yes
 N(1)      C(7)      C(8)      N(3)      -26.6(10)  . . . . yes
 N(1)      C(7)      C(8)      C(9)      158.1(8)   . . . . yes
 N(1)      C(13)     C(14)     N(4)      -49(1)     . . . . yes
 N(2)      Cu(1)     O(1)      C(18)     -140.1(7)  . . . . yes
 N(2)      Cu(1)     N(1)      C(1)      -25.5(6)   . . . . yes
 N(2)      Cu(1)     N(1)      C(7)      -141.6(5)  . . . . yes
 N(2)      Cu(1)     N(1)      C(13)     98.0(6)    . . . . yes
 N(2)      Cu(1)     N(3)      C(8)      86.1(5)    . . . . yes
 N(2)      Cu(1)     N(3)      C(12)     -94.3(7)   . . . . yes
 N(2)      Cu(1)     N(4)      C(14)     -84.3(5)   . . . . yes
 N(2)      Cu(1)     N(4)      C(15)     32.7(7)    . . . . yes
 N(2)      Cu(1)     N(4)      C(16)     155.9(5)   . . . . yes
 N(2)      C(2)      C(3)      C(4)      -2(1)      . . . . yes
 N(2)      C(6)      C(5)      C(4)      -1(2)      . . . . yes
 N(3)      Cu(1)     O(1)      C(18)     101.7(7)   . . . . yes
 N(3)      Cu(1)     N(1)      C(1)      93.5(6)    . . . . yes
 N(3)      Cu(1)     N(1)      C(7)      -22.6(5)   . . . . yes
 N(3)      Cu(1)     N(1)      C(13)     -143.0(6)  . . . . yes
 N(3)      Cu(1)     N(2)      C(2)      -70.1(6)   . . . . yes
 N(3)      Cu(1)     N(2)      C(6)      115.2(9)   . . . . yes
 N(3)      Cu(1)     N(4)      C(14)     73.3(5)    . . . . yes
 N(3)      Cu(1)     N(4)      C(15)     -169.6(7)  . . . . yes
 N(3)      Cu(1)     N(4)      C(16)     -46.5(6)   . . . . yes
 N(3)      C(8)      C(9)      C(10)     -1(1)      . . . . yes
 N(3)      C(12)     C(11)     C(10)     0(1)       . . . . yes
 N(4)      Cu(1)     O(1)      C(18)     -23.6(7)   . . . . yes
 N(4)      Cu(1)     N(1)      C(1)      -142.1(6)  . . . . yes
 N(4)      Cu(1)     N(1)      C(7)      101.8(5)   . . . . yes
 N(4)      Cu(1)     N(1)      C(13)     -18.6(6)   . . . . yes
 N(4)      Cu(1)     N(2)      C(2)      89.0(6)    . . . . yes
 N(4)      Cu(1)     N(2)      C(6)      -85.7(9)   . . . . yes
 N(4)      Cu(1)     N(3)      C(8)      -71.2(6)   . . . . yes
 N(4)      Cu(1)     N(3)      C(12)     108.4(7)   . . . . yes
 N(4)      C(16)     C(17)     N(5)      -69.5(9)   . . . . yes
 N(5)      C(18)     C(19)     C(20)     -147(1)    . . . . yes
 N(5)      C(18)     C(19)     C(21)     96(1)      . . . . yes
 N(5)      C(18)     C(19)     C(22)     -23(1)     . . . . yes
 N(6)      Cu(2)     O(2)      C(40)     -170(1)    . . . . yes
 N(6)      Cu(2)     N(7)      C(24)     9.6(5)     . . . . yes
 N(6)      Cu(2)     N(7)      C(28)     -168.6(7)  . . . . yes
 N(6)      Cu(2)     N(8)      C(30)     4.9(5)     . . . . yes
 N(6)      Cu(2)     N(8)      C(34)     -165.1(8)  . . . . yes
 N(6)      Cu(2)     N(9)      C(36)     -6.9(5)    . . . . yes
 N(6)      Cu(2)     N(9)      C(37)     110.7(7)   . . . . yes
 N(6)      Cu(2)     N(9)      C(38)     -125.0(6)  . . . . yes
 N(6)      C(23)     C(24)     N(7)      -27.0(9)   . . . . yes
 N(6)      C(23)     C(24)     C(25)     157.3(7)   . . . . yes
 N(6)      C(29)     C(30)     N(8)      -35.1(10)  . . . . yes
 N(6)      C(29)     C(30)     C(31)     150.9(8)   . . . . yes
 N(6)      C(35)     C(36)     N(9)      -51.7(10)  . . . . yes
 N(7)      Cu(2)     O(2)      C(40)     101.6(7)   . . . . yes
 N(7)      Cu(2)     N(6)      C(23)     -23.5(5)   . . . . yes
 N(7)      Cu(2)     N(6)      C(29)     93.2(5)    . . . . yes
 N(7)      Cu(2)     N(6)      C(35)     -146.9(5)  . . . . yes
 N(7)      Cu(2)     N(8)      C(30)     -73.0(6)   . . . . yes
 N(7)      Cu(2)     N(8)      C(34)     117.0(8)   . . . . yes
 N(7)      Cu(2)     N(9)      C(36)     72.1(6)    . . . . yes
 N(7)      Cu(2)     N(9)      C(37)     -170.2(7)  . . . . yes
 N(7)      Cu(2)     N(9)      C(38)     -45.9(7)   . . . . yes
 N(7)      C(24)     C(25)     C(26)     -2(1)      . . . . yes
 N(7)      C(28)     C(27)     C(26)     0(1)       . . . . yes
 N(8)      Cu(2)     O(2)      C(40)     -142.8(7)  . . . . yes
 N(8)      Cu(2)     N(6)      C(23)     -140.3(5)  . . . . yes
 N(8)      Cu(2)     N(6)      C(29)     -23.6(5)   . . . . yes
 N(8)      Cu(2)     N(6)      C(35)     96.3(5)    . . . . yes
 N(8)      Cu(2)     N(7)      C(24)     87.0(5)    . . . . yes
 N(8)      Cu(2)     N(7)      C(28)     -91.1(7)   . . . . yes
 N(8)      Cu(2)     N(9)      C(36)     -86.9(5)   . . . . yes
 N(8)      Cu(2)     N(9)      C(37)     30.7(7)    . . . . yes
 N(8)      Cu(2)     N(9)      C(38)     155.1(6)   . . . . yes
 N(8)      C(30)     C(31)     C(32)     -1(1)      . . . . yes
 N(8)      C(34)     C(33)     C(32)     1(2)       . . . . yes
 N(9)      Cu(2)     O(2)      C(40)     -27.0(7)   . . . . yes
 N(9)      Cu(2)     N(6)      C(23)     103.9(5)   . . . . yes
 N(9)      Cu(2)     N(6)      C(29)     -139.4(5)  . . . . yes
 N(9)      Cu(2)     N(6)      C(35)     -19.6(5)   . . . . yes
 N(9)      Cu(2)     N(7)      C(24)     -72.0(6)   . . . . yes
 N(9)      Cu(2)     N(7)      C(28)     109.8(7)   . . . . yes
 N(9)      Cu(2)     N(8)      C(30)     88.5(5)    . . . . yes
 N(9)      Cu(2)     N(8)      C(34)     -81.5(8)   . . . . yes
 N(9)      C(38)     C(39)     N(10)     -67(1)     . . . . yes
 N(10)     C(40)     C(41)     C(42)     -28(1)     . . . . yes
 N(10)     C(40)     C(41)     C(43)     -152(1)    . . . . yes
 N(10)     C(40)     C(41)     C(44)     86(1)      . . . . yes
 C(1)      N(1)      C(7)      C(8)      -84.8(8)   . . . . yes
 C(1)      N(1)      C(13)     C(14)     160.8(8)   . . . . yes
 C(1)      C(2)      N(2)      C(6)      -171.3(9)  . . . . yes
 C(1)      C(2)      C(3)      C(4)      169(1)     . . . . yes
 C(2)      N(2)      C(6)      C(5)      0(1)       . . . . yes
 C(2)      C(1)      N(1)      C(7)      154.6(7)   . . . . yes
 C(2)      C(1)      N(1)      C(13)     -80.1(9)   . . . . yes
 C(2)      C(3)      C(4)      C(5)      1(1)       . . . . yes
 C(3)      C(2)      N(2)      C(6)      0(1)       . . . . yes
 C(3)      C(4)      C(5)      C(6)      0(1)       . . . . yes
 C(7)      N(1)      C(13)     C(14)     -76.4(9)   . . . . yes
 C(7)      C(8)      N(3)      C(12)     -172.5(7)  . . . . yes
 C(7)      C(8)      C(9)      C(10)     173.2(8)   . . . . yes
 C(8)      N(3)      C(12)     C(11)     -1(1)      . . . . yes
 C(8)      C(7)      N(1)      C(13)     148.5(7)   . . . . yes
 C(8)      C(9)      C(10)     C(11)     0(1)       . . . . yes
 C(9)      C(8)      N(3)      C(12)     2(1)       . . . . yes
 C(9)      C(10)     C(11)     C(12)     1(1)       . . . . yes
 C(13)     C(14)     N(4)      C(15)     -84(1)     . . . . yes
 C(13)     C(14)     N(4)      C(16)     152.7(8)   . . . . yes
 C(14)     N(4)      C(16)     C(17)     -133.2(7)  . . . . yes
 C(15)     N(4)      C(16)     C(17)     104.4(8)   . . . . yes
 C(16)     C(17)     N(5)      C(18)     85(1)      . . . . yes
 C(17)     N(5)      C(18)     C(19)     172.7(7)   . . . . yes
 C(23)     N(6)      C(29)     C(30)     155.9(7)   . . . . yes
 C(23)     N(6)      C(35)     C(36)     -77.8(9)   . . . . yes
 C(23)     C(24)     N(7)      C(28)     -174.4(7)  . . . . yes
 C(23)     C(24)     C(25)     C(26)     173.0(8)   . . . . yes
 C(24)     N(7)      C(28)     C(27)     0(1)       . . . . yes
 C(24)     C(23)     N(6)      C(29)     -85.1(8)   . . . . yes
 C(24)     C(23)     N(6)      C(35)     151.5(7)   . . . . yes
 C(24)     C(25)     C(26)     C(27)     1(1)       . . . . yes
 C(25)     C(24)     N(7)      C(28)     1(1)       . . . . yes
 C(25)     C(26)     C(27)     C(28)     0(1)       . . . . yes
 C(29)     N(6)      C(35)     C(36)     161.0(7)   . . . . yes
 C(29)     C(30)     N(8)      C(34)     -173.6(8)  . . . . yes
 C(29)     C(30)     C(31)     C(32)     171.9(10)  . . . . yes
 C(30)     N(8)      C(34)     C(33)     0(1)       . . . . yes
 C(30)     C(29)     N(6)      C(35)     -78.8(8)   . . . . yes
 C(30)     C(31)     C(32)     C(33)     2(1)       . . . . yes
 C(31)     C(30)     N(8)      C(34)     0(1)       . . . . yes
 C(31)     C(32)     C(33)     C(34)     -1(2)      . . . . yes
 C(35)     C(36)     N(9)      C(37)     -82.8(10)  . . . . yes
 C(35)     C(36)     N(9)      C(38)     154.4(8)   . . . . yes
 C(36)     N(9)      C(38)     C(39)     -135.3(8)  . . . . yes
 C(37)     N(9)      C(38)     C(39)     102(1)     . . . . yes
 C(38)     C(39)     N(10)     C(40)     86(1)      . . . . yes
 C(39)     N(10)     C(40)     C(41)     173.7(8)   . . . . yes
 C(39)     N(10)     C(40)     C(41)     173.7(8)   . . . . yes
#------------------------------------------------------------------------------
loop_
_geom_contact_atom_site_label_1
_geom_contact_atom_site_label_2
_geom_contact_distance
_geom_contact_site_symmetry_1
_geom_contact_site_symmetry_2
_geom_contact_publ_flag
 O(3)      C(39)     3.12(1)    . 2_744 ?
 O(3)      C(24)     3.24(1)    . 2_744 ?
 O(3)      N(7)      3.29(1)    . 2_744 ?
 O(3)      C(38)     3.40(2)    . 2_744 ?
 O(3)      C(33)     3.42(2)    . 3_644 ?
 O(3)      C(23)     3.56(2)    . 2_744 ?
 O(4)      C(1)      3.45(2)    . 1_545 ?
 O(4)      N(5)      3.58(2)    . . ?
 O(5)      C(16)     3.17(1)    . . ?
 O(5)      C(17)     3.24(1)    . . ?
 O(5)      N(5)      3.30(1)    . . ?
 O(5)      C(37)     3.33(2)    . 3_644 ?
 O(5)      O(7)      3.37(1)    . . ?
 O(6)      C(13)     3.26(1)    . 1_545 ?
 O(6)      C(25)     3.41(1)    . 2_744 ?
 O(6)      C(37)     3.41(1)    . 3_644 ?
 O(6)      C(24)     3.57(1)    . 2_744 ?
 O(6)      C(23)     3.59(1)    . 2_744 ?
 O(7)      N(5)      3.074(9)   . . ?
 O(7)      C(22)     3.44(1)    . . ?
 O(7)      C(17)     3.45(1)    . . ?
 O(7)      C(37)     3.49(2)    . 3_644 ?
 O(7)      C(1)      3.56(1)    . 1_545 ?
 O(8)      C(26)     3.35(1)    . 4_445 ?
 O(8)      C(43)     3.45(2)    . 1_545 ?
 O(8)      C(9)      3.50(2)    . 1_545 ?
 O(8)      C(27)     3.58(1)    . 4_445 ?
 O(9)      N(5)      3.40(1)    . . ?
 O(9)      C(17)     3.51(1)    . . ?
 O(10)     C(27)     3.41(1)    . 4_445 ?
 O(10)     C(36)     3.51(1)    . 3_644 ?
 O(10)     C(9)      3.52(1)    . 1_545 ?
 O(11)     C(17)     3.166(10)  . . ?
 O(11)     C(8)      3.21(1)    . . ?
 O(11)     C(16)     3.37(1)    . . ?
 O(11)     N(3)      3.370(9)   . . ?
 O(11)     C(7)      3.44(1)    . . ?
 O(11)     C(5)      3.44(1)    . 4_445 ?
 O(12)     N(10)     3.15(1)    . 3_654 ?
 O(12)     O(16)     3.36(1)    . . ?
 O(13)     C(38)     3.35(1)    . 3_654 ?
 O(13)     C(9)      3.37(1)    . . ?
 O(13)     C(15)     3.47(1)    . 4_445 ?
 O(14)     O(16)     3.18(1)    . . ?
 O(14)     C(35)     3.22(1)    . 3_644 ?
 O(14)     C(15)     3.32(1)    . 4_445 ?
 O(14)     C(29)     3.56(1)    . 3_644 ?
 O(14)     C(6)      3.58(1)    . 4_445 ?
 O(15)     C(10)     3.32(1)    . 2_644 ?
 O(15)     C(25)     3.41(2)    . 3_644 ?
 O(15)     C(20)     3.45(2)    . 3_654 ?
 O(16)     N(10)     3.114(10)  . 3_654 ?
 O(16)     C(39)     3.44(1)    . 3_654 ?
 O(16)     C(15)     3.49(1)    . 4_445 ?
 O(16)     C(42)     3.51(1)    . 3_654 ?
 O(16)     C(29)     3.57(1)    . 3_644 ?
 O(17)     N(10)     3.46(1)    . 3_654 ?
 O(17)     C(32)     3.58(1)    . 2_654 ?
 O(17)     C(39)     3.59(2)    . 3_654 ?
 O(18)     C(11)     3.40(1)    . 2_644 ?
 O(18)     C(25)     3.52(1)    . 3_644 ?
 O(18)     C(14)     3.52(1)    . 4_445 ?
#------------------------------------------------------------------------------
loop_
_geom_hbond_atom_site_label_D
_geom_hbond_atom_site_label_H
_geom_hbond_atom_site_label_A
_geom_hbond_site_symmetry_D
_geom_hbond_site_symmetry_H
_geom_hbond_site_symmetry_A
_geom_hbond_site_distance_DH
_geom_hbond_site_distance_HA
_geom_hbond_site_distance_DA
_geom_hbond_angle_DHA
_geom_hbond_publ_flag
N(5)     H(1)     O(4)     . . 1_555 0.961 2.751 3.58(1) 144.632 no
N(5)     H(1)     O(5)     . . 1_555 0.961 2.748 3.30(2) 117.319 no
N(5)     H(1)     O(7)     . . 1_555 0.961 2.459 3.074(7) 121.649 no
N(10)    H(2)     O(12)    . . 3_655 0.944 2.384 3.15(1) 138.096 no
N(10)    H(2)     O(16)    . . 3_655 0.944 2.525 3.114(7) 120.640 no
#------------------------------------------------------------------------------
#     End of CIF
#------------------------------------------------------------------------------
